# Supplementary material for: All-fabric-based multifunctional textile sensor for detection and discrimination of humidity, temperature, and strain stimuli
Source: Royal Society of Chemistry journal article supplement (doi:10.1039/d1tc02755g), 2021-01-01
Supplement: d1tc02755g1.pdf [file d1tc02755g1.pdf]

## Supporting Information

# All Fabric-Based Multifunctional Textile Sensor for Detections and Discriminations of Humidity, Temperature, and Strain Stimuli

*Shuaitao Yang<sup>1</sup>, Chengwei Li<sup>1</sup>, Ningxuan Wen<sup>1</sup>, Shihong Xu<sup>2</sup>, Hui Huang<sup>1</sup>, Tianze  
Cong<sup>1</sup>, Yongpeng Zhao<sup>2</sup>, Zeng Fan<sup>1</sup>, Kun Liu<sup>3</sup>, Lujun Pan<sup>\*1</sup>*

<sup>1</sup>School of Physics, <sup>2</sup>School of Microelectronics and <sup>3</sup>School of Optoelectronic  
Engineering and Instrumentation Science, Dalian University of Technology, No. 2  
Linggong Road, Ganjingzi District, Dalian 116024, P.R. China

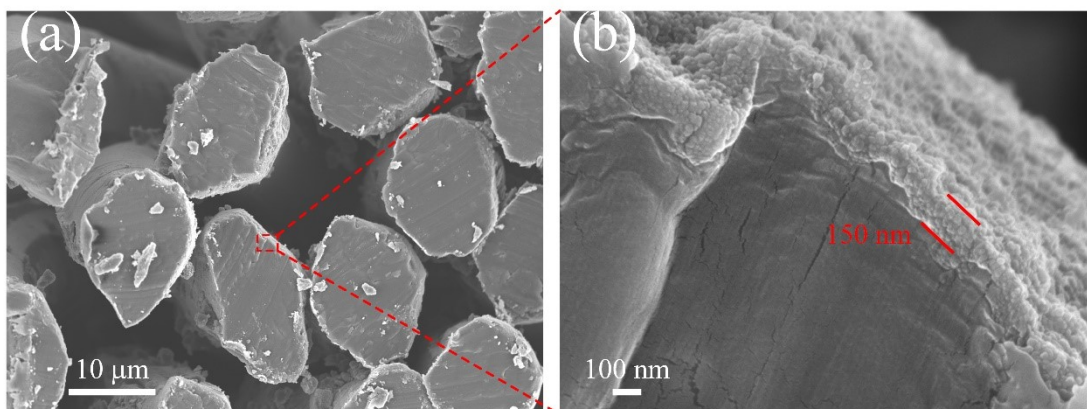

**Figure S1.** (a) Cross-section images of the carbon particle coated fabric. (b) Enlarged view in (a).

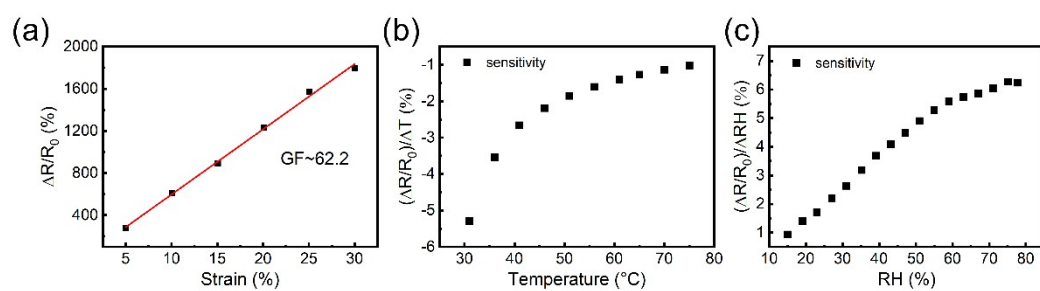

**Figure S2.** Sensitivity of the conductive fabric in response to (a) strain, (b) humidity, and (c) temperature.

**Table S1.** Comparison of various textile strain sensors reported in the literature.

| Sensing mechanism | Fabrication method       | Fabric type                    | Sensing medium              | Gauge factor                            | Strain range  | Ref.      |
|-------------------|--------------------------|--------------------------------|-----------------------------|-----------------------------------------|---------------|-----------|
| Resistance        | Dip-coating              | Nylon fabric                   | Mxene                       | 24.35                                   | 0~20%         | 1         |
| Resistance        | Dip-coating              | Polyester fabric               | RGO                         | -26 (y direction)<br>-1.7 (x direction) | 0~8%<br>0~15% | 2         |
| Resistance        | Dip-coating              | Cupra fabric                   | Home-made pen ink           | 2.63                                    | 0~23%         | 3         |
| Resistance        | Dip-coating              | Nylon/PU fabric                | RGO                         | 18.5 (0~10%)<br>12.1 (10~18%)           | 0~30%         | 4         |
| Resistance        | Dip-coating              | Nylon/spandex fabric           | Carbonic pen ink            | 62.2                                    | 0~30%         | This work |
| Capacitance       | Laser cutting            | Conductive fabric              | Silicone elastomer          | 1.23                                    | 0~100%        | 5         |
| Capacitance       | Multicore-shell printing | Silicone multicore-shell fiber | Ionicallly conductive fluid | 0.35                                    | 0~250%        | 6         |
| Capacitance       | Twisting                 | Ecoflex@CNT core-shell fiber   | CNT                         | 0.6                                     | 0~200%        | 7         |
| Capacitance       | Sewing                   | Nylon/spandex fabric           | Carbon black                | 1.5                                     | 0~30%         | This work |

RGO: reduced graphene oxide; Cupra: cuprammonium rayon; PU: polyurethane.

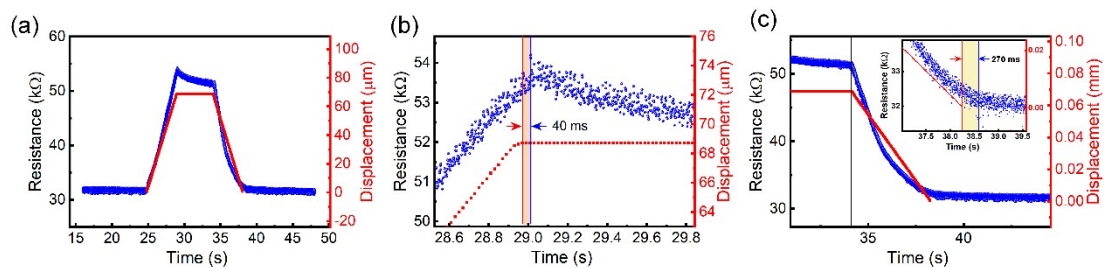

**Figure S3.** (a) Real-time resistance of the sensor in the process of applying 0-1-0% strain. (b) The delay between the resistive response and the applied strain. (c) Recover time of the sensor in response to 1% strain.

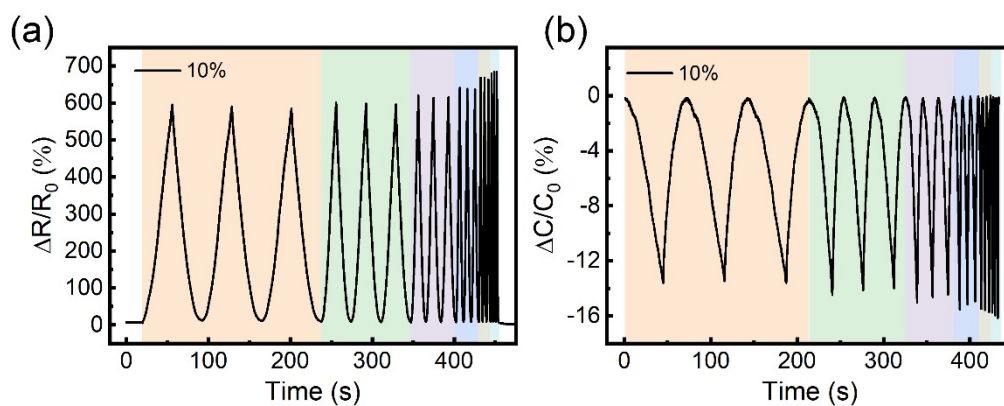

**Figure S4.** Influence of the strain rate on the sensing properties of (a) resistive and (b) capacitive sensors. The sensor was stretched to 10% at a strain rate of 0.5, 1, 2, 4, 6, 8 mm/min.

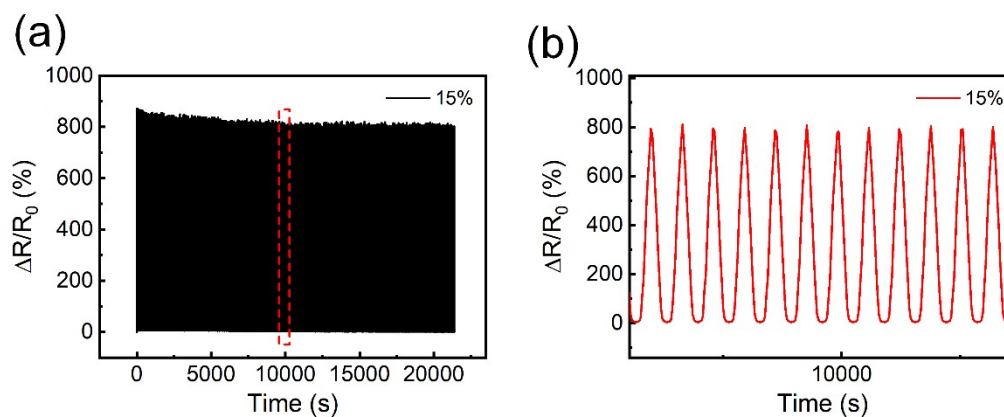

**Figure S5.** (a) 5000 cycles tensile test of the conductive fabric. (b) Enlarged view of several cycles in (a).

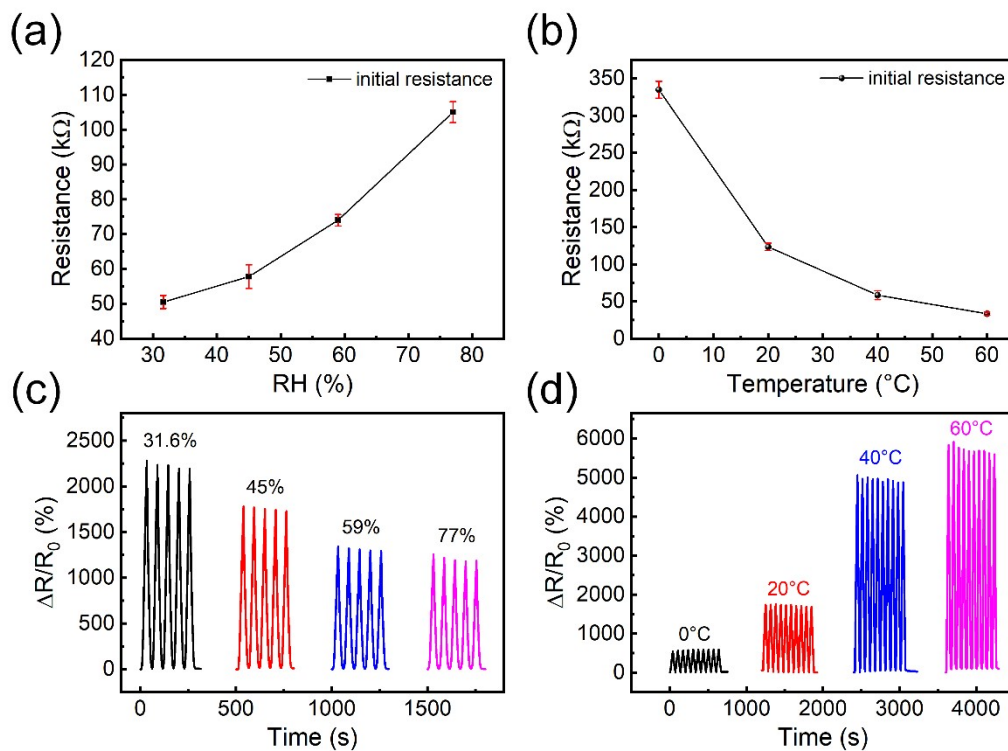

**Figure S6.** (a) Initial resistance of the conductive fabric at different humidity. (b) Initial resistance of the conductive fabric at different temperatures. Influence of (c) humidity and (d) temperature on strain sensing performance.

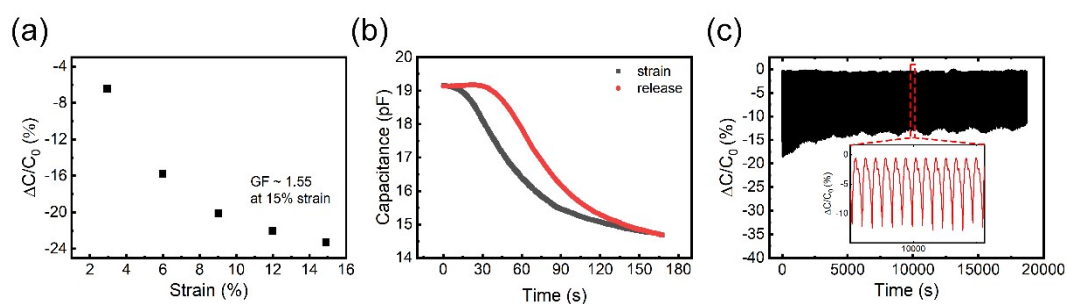

**Figure S7.** (a) Relative capacitance of the sandwich structured sensor stretched to 15%. (b) Hysteresis behavior of the capacitive strain sensor. (c) Long-term stability test of the capacitance strain sensor in more than 5000 cycles.

**Table S2.** Initial resistance and capacitance, and sensitivity of the sensors prepared in one batch.

|       | Sample 1        | Sample 2        | Sample 3        | Sample 4        | Sample 5        | Mean | S.D. |
|-------|-----------------|-----------------|-----------------|-----------------|-----------------|------|------|
| $R_0$ | 38.2 k $\Omega$ | 33.3 k $\Omega$ | 34.6 k $\Omega$ | 31.8 k $\Omega$ | 34.2 k $\Omega$ | 34.0 | 2.55 |
| GF-R  | 61.5            | 63.4            | 65.4            | 59.2            | 61.7            | 62.2 | 2.31 |
| $C_0$ | 15.2 pF         | 14.5 pF         | 17.6 pF         | 14.0 pF         | 14.8 pF         | 15.2 | 1.40 |
| GF-C  | 1.56            | 1.43            | 1.51            | 1.47            | 1.50            | 1.49 | 0.05 |

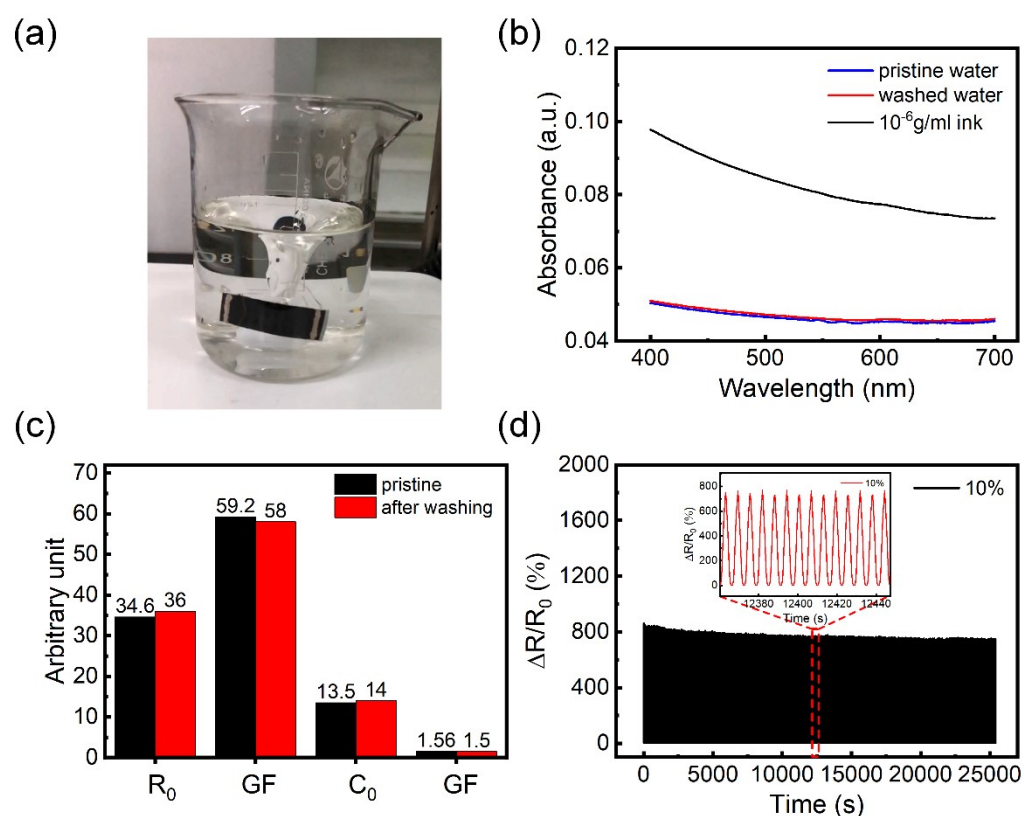

**Figure S8.** (a) Optical image of the textile sensor washed with water. (b) Visible absorption spectrum of the DI water, washed water, and  $10^{-6}$  g/ml ink solution. (c) Initial resistance and capacitance, and sensitivity of the corresponding resistive and capacitive sensors. (d) Stability test of the washed textile sensor in more than 5000 cycles.

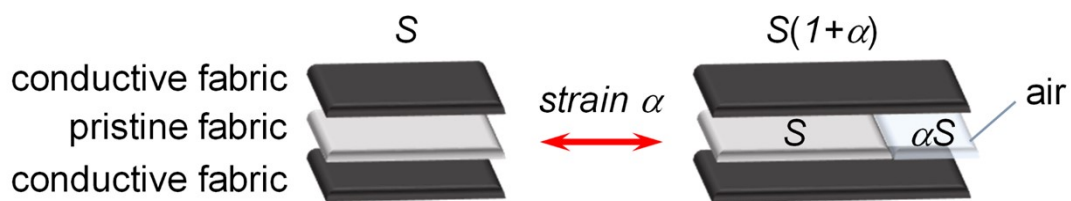

**Figure S9.** The schematic diagram illustrates the influence of air entry on the capacitance of the sensor during stretching.

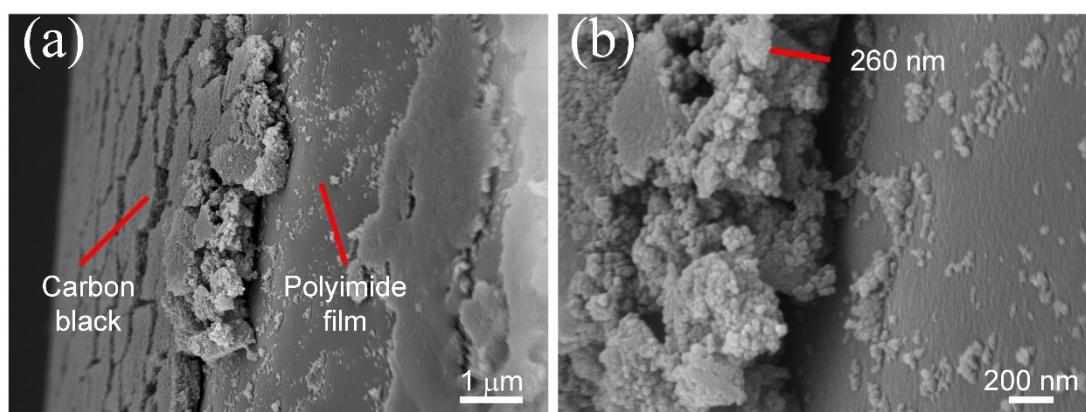

**Figure S10.** The thickness of the carbon black layer spin-coated on the polyimide film.

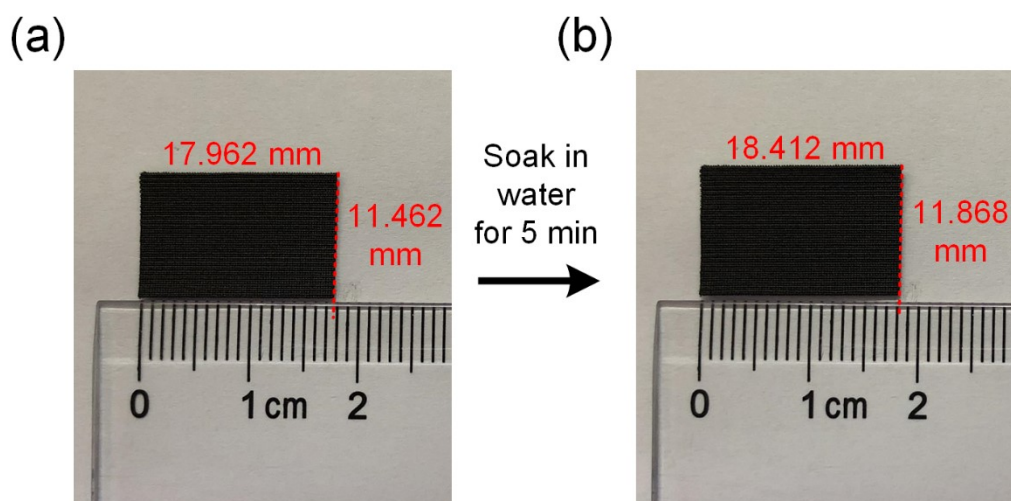

**Figure S11.** Water swelling of the conductive fabric.



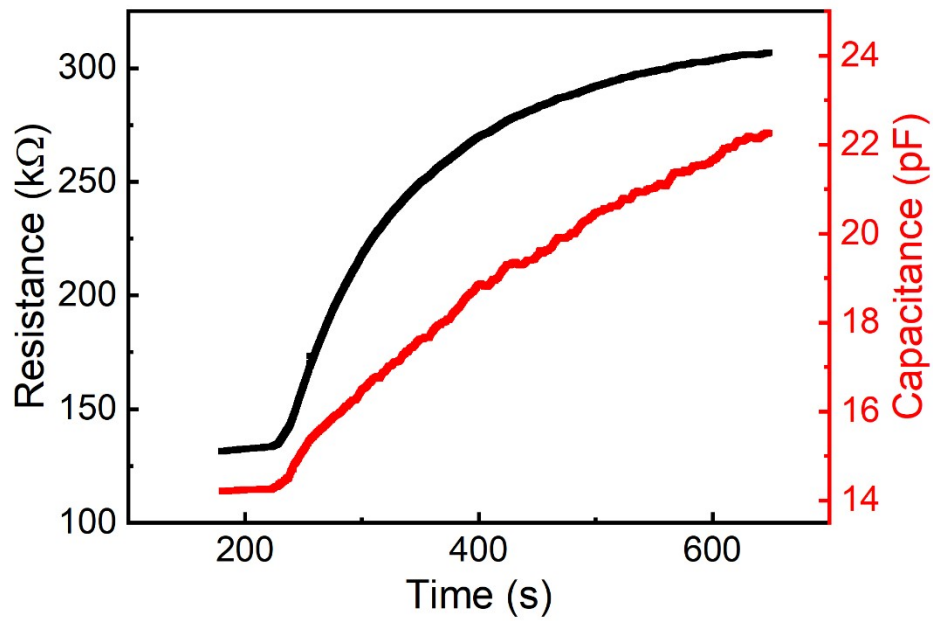

**Figure S12.** Resistance and capacitance response of the sensor when the baby's diaper gets wet.

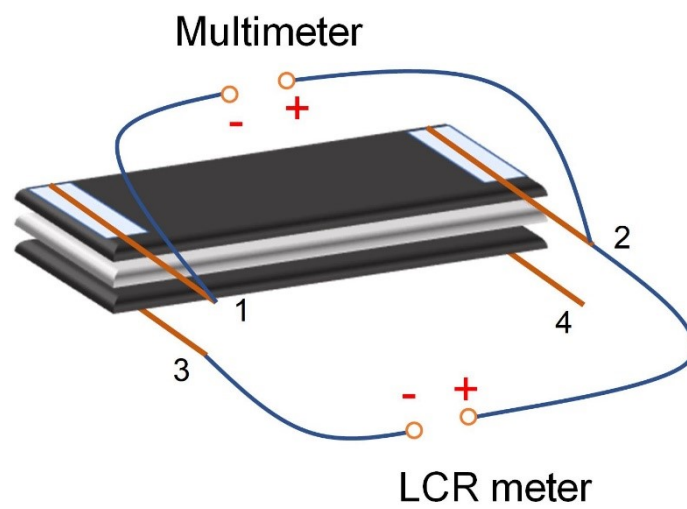

**Figure S13.** Scheme of measuring resistance and capacitance at the same time.



# References

- 1 L. Yuan, M. Zhang, T. Zhao, T. Li, H. Zhang, L. Chen and J. Zhang, *Sensor Actuat. A Phys.*, 2020, **315**, 112192.
- 2 Z. Yang, Y. Pang, X.-L. Han, Y. Yang, J. Ling, M. Jian, Y. Zhang, Y. Yang and T.-L. Ren, *ACS Nano*, 2018, **12**, 9134–9141.
- 3 S. Bi, L. Hou, H. Zhao, L. Zhu and Y. Lu, *J. Mater. Chem. A*, 2018, **6**, 16556–16565.
- 4 G. Cai, M. Yang, Z. Xu, J. Liu, B. Tang and X. Wang, *Chem. Eng. J.*, 2017, **325**, 396–403.
- 5 A. Atalay, V. Sanchez, O. Atalay, D. M. Vogt, F. Haufe, R. J. Wood and C. J. Walsh, *Adv. Mater. Technol.*, 2017, **2**, 1700136.
- 6 A. Frutiger, J. T. Muth, D. M. Vogt, Y. Mengüç, A. Campo, A. D. Valentine, C. J. Walsh and J. A. Lewis, *Adv. Mater.*, 2015, **27**, 2440–2446.
- 7 C. Choi, J. M. Lee, S. H. Kim, S. J. Kim, J. Di and R. H. Baughman, *Nano Lett.*, 2016, **16**, 7677–7684.
